# Supplementary material for: Can We Find an Optimal Fatty Acid Composition of Biodiesel in Order to Improve Oxidation Stability?
Source: MDPI journal article supplement (doi:10.3390/su151310310), 2023-06-29
Supplement: s1 [file s1]

Figure S1

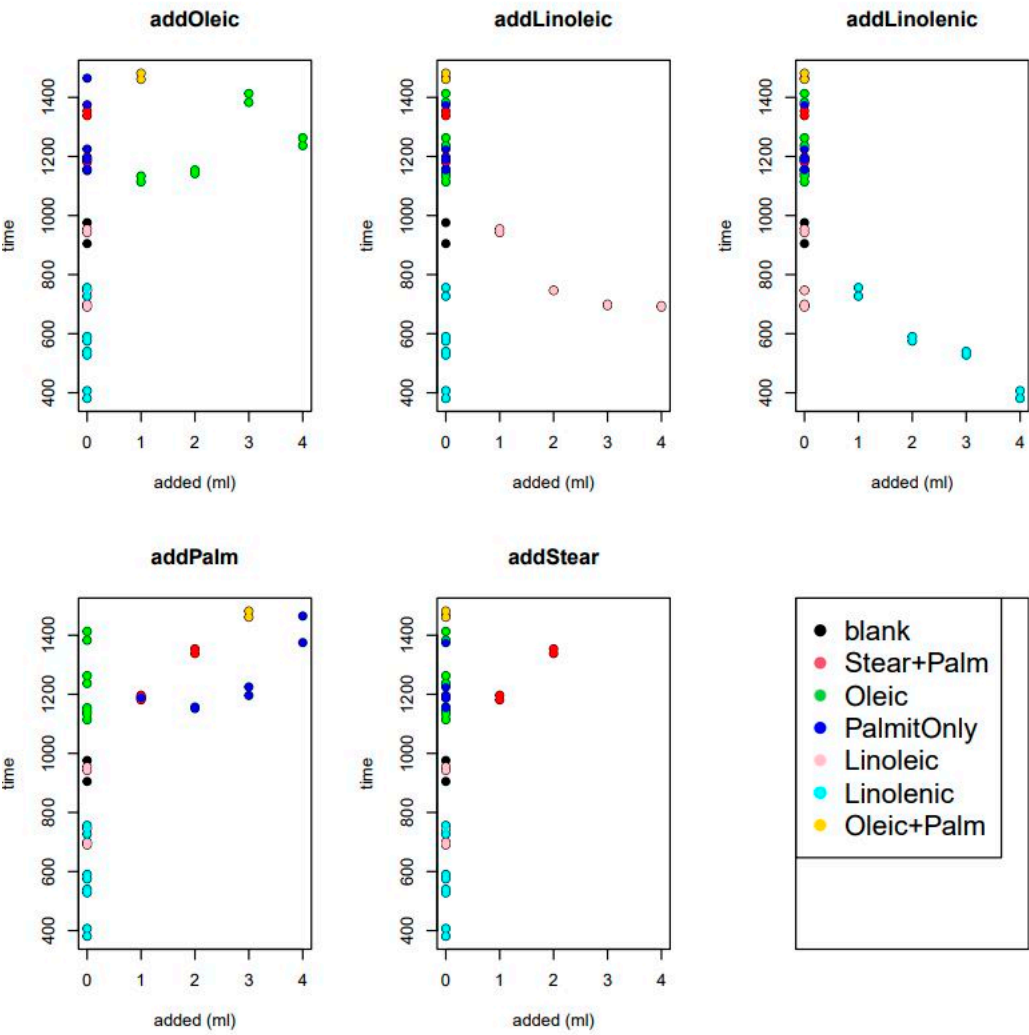

Table S1

| Blend | Quantity added |          |           |          |         |   | Mean<br>time | SD time | 95% confidence<br>interval |                |
|-------|----------------|----------|-----------|----------|---------|---|--------------|---------|----------------------------|----------------|
|       | Oleic          | Linoleic | Linolenic | Palmitic | Stearic |   |              |         | Upper<br>limit             | Lower<br>limit |
| 1     | 1              | 0        | 0         | 0        | 0       | 0 | 1124         | 14,14   | 1167                       | 1081           |
| 2     | 2              | 0        | 0         | 0        | 0       | 0 | 1148         | 8,49    | 1173,8                     | 1122,2         |
| 3     | 3              | 0        | 0         | 0        | 0       | 0 | 1398         | 21,21   | 1462,5                     | 1333,5         |
| 4     | 4              | 0        | 0         | 0        | 0       | 0 | 1250         | 18,38   | 1305,9                     | 1194,1         |
| 5     | 0              | 1        | 0         | 0        | 0       | 0 | 948,5        | 9,19    | 976,45                     | 920,55         |
| 6     | 0              | 2        | 0         | 0        | 0       | 0 | 746,5        | 0,71    | 748,65                     | 744,35         |
| 7     | 0              | 3        | 0         | 0        | 0       | 0 | 697,5        | 3,54    | 708,25                     | 686,75         |
| 8     | 0              | 4        | 0         | 0        | 0       | 0 | 692,5        | 3,54    | 703,25                     | 681,75         |
| 9     | 0              | 0        | 1         | 0        | 0       | 0 | 741,5        | 20,51   | 803,85                     | 679,15         |
| 10    | 0              | 0        | 2         | 0        | 0       | 0 | 582,5        | 10,61   | 614,75                     | 550,25         |
| 11    | 0              | 0        | 3         | 0        | 0       | 0 | 534          | 8,49    | 559,8                      | 508,2          |
| 12    | 0              | 0        | 4         | 0        | 0       | 0 | 394          | 18,38   | 449,9                      | 338,1          |
| 13    | 0              | 0        | 0         | 0        | 0       | 0 | 940,5        | 50,2    | 1093,15                    | 787,85         |
| 14    | 0              | 0        | 0         | 0        | 1       | 0 | 1188,5       | 2,12    | 1194,95                    | 1182,05        |
| 15    | 0              | 0        | 0         | 0        | 2       | 0 | 1154,5       | 3,54    | 1165,25                    | 1143,75        |
| 16    | 0              | 0        | 0         | 0        | 3       | 0 | 1210,5       | 20,51   | 1272,85                    | 1148,15        |
| 17    | 0              | 0        | 0         | 0        | 4       | 0 | 1420         | 63,64   | 1613,5                     | 1226,5         |
| 18    | 0              | 0        | 0         | 0        | 1       | 1 | 1189         | 11,31   | 1223,4                     | 1154,6         |
| 19    | 0              | 0        | 0         | 0        | 2       | 2 | 1346         | 11,31   | 1380,4                     | 1311,6         |
| 20    | 1              | 0        | 0         | 0        | 3       | 0 | 1471,5       | 14,85   | 1516,65                    | 1426,35        |
